# Supplementary material for: Predictors of Atrial Fibrillation in Patients With Stroke Attributed to Large- or Small-Vessel Disease: A Prespecified Secondary Analysis of the STROKE AF Randomized Clinical Trial
Source: PubMed Central journal article supplement — JAMA Neurol. 2022 Nov 14;80(1):99–103. doi: 10.1001/jamaneurol.2022.4038 (PMC9664367; doi:10.1001/jamaneurol.2022.4038), 2022-11-14
Supplement: jamaneurol-e224038-s003.pdf [file jamaneurol-e224038-s003.pdf]

\*First name, last name, and suffix (if applicable) are required and will appear in PubMed.

| <b>*Group Name(s): STROKE AF Investigators</b> |                   |                              |                  |             |                                          |                                                         |                                                                                            |
|------------------------------------------------|-------------------|------------------------------|------------------|-------------|------------------------------------------|---------------------------------------------------------|--------------------------------------------------------------------------------------------|
| <b>*First Name and Middle Initial(s)</b>       | <b>*Last Name</b> | <b>*Suffix (eg, Jr, III)</b> | Academic Degrees | Institution | Location (city, state/province, country) | Role or Contribution, eg, chair, principal investigator | Group (if more than 1 Group listed in the byline and/or Subgroup (eg, Steering Committee)) |
| Freddy                                         | Abi-Samra         |                              |                  |             |                                          |                                                         |                                                                                            |
| Indrani                                        | Acosta            |                              |                  |             |                                          |                                                         |                                                                                            |
| Ali                                            | Al Balushi        |                              |                  |             |                                          |                                                         |                                                                                            |
| Ahmad                                          | Al-Awwad          |                              |                  |             |                                          |                                                         |                                                                                            |
| Rizwan                                         | Alimohammad       |                              |                  |             |                                          |                                                         |                                                                                            |
| Moayd                                          | Alkhalifah        |                              |                  |             |                                          |                                                         |                                                                                            |
| James                                          | Allred            |                              |                  |             |                                          |                                                         |                                                                                            |
| Mohammad                                       | Alsorogi          |                              |                  |             |                                          |                                                         |                                                                                            |
| Valerie                                        | Arias             |                              |                  |             |                                          |                                                         |                                                                                            |
| Sushanth                                       | Aroor             |                              |                  |             |                                          |                                                         |                                                                                            |
| Rohan                                          | Arora             |                              |                  |             |                                          |                                                         |                                                                                            |
| Negar                                          | Asdaghi           |                              |                  |             |                                          |                                                         |                                                                                            |
| Khaled                                         | Asi               |                              |                  |             |                                          |                                                         |                                                                                            |
| Manish                                         | Assar             |                              |                  |             |                                          |                                                         |                                                                                            |
| Nitish                                         | Badhwar           |                              |                  |             |                                          |                                                         |                                                                                            |
| Javier                                         | Banchs            |                              |                  |             |                                          |                                                         |                                                                                            |
| Sandeep                                        | Bansal            |                              |                  |             |                                          |                                                         |                                                                                            |
| Conor                                          | Barrett           |                              |                  |             |                                          |                                                         |                                                                                            |
| Bahar                                          | Beaver            |                              |                  |             |                                          |                                                         |                                                                                            |
| Stuart                                         | Beldner           |                              |                  |             |                                          |                                                         |                                                                                            |
| Gary                                           | Belt              |                              |                  |             |                                          |                                                         |                                                                                            |
| Matthew                                        | Bernabei          |                              |                  |             |                                          |                                                         |                                                                                            |
| Michael                                        | Bernard           |                              |                  |             |                                          |                                                         |                                                                                            |
| Nirav                                          | Bhatt             |                              |                  |             |                                          |                                                         |                                                                                            |
| James                                          | Black             |                              |                  |             |                                          |                                                         |                                                                                            |
| Don                                            | Bledsoe           |                              |                  |             |                                          |                                                         |                                                                                            |
| Heather                                        | Bonaguidi         |                              |                  |             |                                          |                                                         |                                                                                            |
| Kay                                            | Bonyak            |                              |                  |             |                                          |                                                         |                                                                                            |

Supplemental Online Content: Nonauthor Collaborators

\*First name, last name, and suffix (if applicable) are required and will appear in PubMed.

| *First Name and Middle Initial(s) | *Last Name    | *Suffix (eg, Jr, III) | Academic Degrees | Institution | Location (city, state/province, country) | Role or Contribution, eg, chair, principal investigator | Group (if more than 1 Group listed in the byline) and/or Subgroup (eg, Steering Committee) |
|-----------------------------------|---------------|-----------------------|------------------|-------------|------------------------------------------|---------------------------------------------------------|--------------------------------------------------------------------------------------------|
| Clara                             | Boyd          |                       |                  |             |                                          |                                                         |                                                                                            |
| Christian                         | Cajavilca     |                       |                  |             |                                          |                                                         |                                                                                            |
| Frances                           | Caprio        |                       |                  |             |                                          |                                                         |                                                                                            |
| Jacqueline                        | Carter        |                       |                  |             |                                          |                                                         |                                                                                            |
| Breehan                           | Chancellor    |                       |                  |             |                                          |                                                         |                                                                                            |
| Cherylee                          | Chang         |                       |                  |             |                                          |                                                         |                                                                                            |
| Gauhar                            | Chaudhary     |                       |                  |             |                                          |                                                         |                                                                                            |
| Shuchi                            | Chaudhary     |                       |                  |             |                                          |                                                         |                                                                                            |
| Peter                             | Cheung        |                       |                  |             |                                          |                                                         |                                                                                            |
| Marilou                           | Ching         |                       |                  |             |                                          |                                                         |                                                                                            |
| Larry                             | Chinitz       |                       |                  |             |                                          |                                                         |                                                                                            |
| David                             | Chiu          |                       |                  |             |                                          |                                                         |                                                                                            |
| Himanshu                          | Chokhawala    |                       |                  |             |                                          |                                                         |                                                                                            |
| Indrajit                          | Choudhuri     |                       |                  |             |                                          |                                                         |                                                                                            |
| Subbarao                          | Choudry       |                       |                  |             |                                          |                                                         |                                                                                            |
| Stephen                           | Clayton       |                       |                  |             |                                          |                                                         |                                                                                            |
| Jonathan                          | Cross         |                       |                  |             |                                          |                                                         |                                                                                            |
| Brett                             | Cucchiara     |                       |                  |             |                                          |                                                         |                                                                                            |
| Andre                             | Culpepper     |                       |                  |             |                                          |                                                         |                                                                                            |
| James                             | Daniels       |                       |                  |             |                                          |                                                         |                                                                                            |
| Subasini                          | Dash          |                       |                  |             |                                          |                                                         |                                                                                            |
| Victor                            | Del Brutto    |                       |                  |             |                                          |                                                         |                                                                                            |
| Christopher                       | Deline        |                       |                  |             |                                          |                                                         |                                                                                            |
| Claire                            | Delpirou Nouh |                       |                  |             |                                          |                                                         |                                                                                            |
| Rajat                             | Deo           |                       |                  |             |                                          |                                                         |                                                                                            |
| Mandip                            | Dhamoon       |                       |                  |             |                                          |                                                         |                                                                                            |
| George                            | Dillon        |                       |                  |             |                                          |                                                         |                                                                                            |
| Alan                              | Donsky        |                       |                  |             |                                          |                                                         |                                                                                            |
| Amit                              | Doshi         |                       |                  |             |                                          |                                                         |                                                                                            |
| Amanda                            | Downey        |                       |                  |             |                                          |                                                         |                                                                                            |

Supplemental Online Content: Nonauthor Collaborators

\*First name, last name, and suffix (if applicable) are required and will appear in PubMed.

| *First Name and Middle Initial(s) | *Last Name | *Suffix (eg, Jr, III) | Academic Degrees | Institution | Location (city, state/province, country) | Role or Contribution, eg, chair, principal investigator | Group (if more than 1 Group listed in the byline and/or Subgroup (eg, Steering Committee)) |
|-----------------------------------|------------|-----------------------|------------------|-------------|------------------------------------------|---------------------------------------------------------|--------------------------------------------------------------------------------------------|
| Srinivas                          | Dukkipati  |                       |                  |             |                                          |                                                         |                                                                                            |
| Laurence                          | Epstein    |                       |                  |             |                                          |                                                         |                                                                                            |
| Mark                              | Etherton   |                       |                  |             |                                          |                                                         |                                                                                            |
| Michael                           | Fara       |                       |                  |             |                                          |                                                         |                                                                                            |
| Pierre B                          | Fayad      |                       |                  |             |                                          |                                                         |                                                                                            |
| Robert                            | Felberg    |                       |                  |             |                                          |                                                         |                                                                                            |
| Murray                            | Flaster    |                       |                  |             |                                          |                                                         |                                                                                            |
| David                             | Frankel    |                       |                  |             |                                          |                                                         |                                                                                            |
| Steve                             | Furer      |                       |                  |             |                                          |                                                         |                                                                                            |
| Rajan                             | Gadhia     |                       |                  |             |                                          |                                                         |                                                                                            |
| Paul                              | Gadient    |                       |                  |             |                                          |                                                         |                                                                                            |
| Paul                              | Garabelli  |                       |                  |             |                                          |                                                         |                                                                                            |
| Douglas                           | Gibson     |                       |                  |             |                                          |                                                         |                                                                                            |
| Taya                              | Glotzer    |                       |                  |             |                                          |                                                         |                                                                                            |
| David                             | Goltz      |                       |                  |             |                                          |                                                         |                                                                                            |
| David                             | Gordon     |                       |                  |             |                                          |                                                         |                                                                                            |
| Sarah                             | Graner     |                       |                  |             |                                          |                                                         |                                                                                            |
| Dion                              | Graybeal   |                       |                  |             |                                          |                                                         |                                                                                            |
| Maranda Randi                     | Grimes     |                       |                  |             |                                          |                                                         |                                                                                            |
| Waldo                             | Guerrero   |                       |                  |             |                                          |                                                         |                                                                                            |
| John                              | Hanna      |                       |                  |             |                                          |                                                         |                                                                                            |
| Qing                              | Hao        |                       |                  |             |                                          |                                                         |                                                                                            |
| Sanjeev                           | Hasabnis   |                       |                  |             |                                          |                                                         |                                                                                            |
| Rashedul                          | Hasan      |                       |                  |             |                                          |                                                         |                                                                                            |
| E Kevin                           | Heist      |                       |                  |             |                                          |                                                         |                                                                                            |
| Deborah                           | Horowitz   |                       |                  |             |                                          |                                                         |                                                                                            |
| J Maurice                         | Hourihane  |                       |                  |             |                                          |                                                         |                                                                                            |
| Haitham                           | Hussein    |                       |                  |             |                                          |                                                         |                                                                                            |
| Koto                              | Ishida     |                       |                  |             |                                          |                                                         |                                                                                            |
| Haisam                            | Ismail     |                       |                  |             |                                          |                                                         |                                                                                            |
| Ram                               | Jadonath   |                       |                  |             |                                          |                                                         |                                                                                            |

Supplemental Online Content: Nonauthor Collaborators

\*First name, last name, and suffix (if applicable) are required and will appear in PubMed.

| *First Name and Middle Initial(s) | *Last Name  | *Suffix (eg, Jr, III) | Academic Degrees | Institution | Location (city, state/province, country) | Role or Contribution, eg, chair, principal investigator | Group (if more than 1 Group listed in the byline) and/or Subgroup (eg, Steering Committee) |
|-----------------------------------|-------------|-----------------------|------------------|-------------|------------------------------------------|---------------------------------------------------------|--------------------------------------------------------------------------------------------|
| Sameer                            | Jamal       |                       |                  |             |                                          |                                                         |                                                                                            |
| Pradipkumar                       | Jamnadas    |                       |                  |             |                                          |                                                         |                                                                                            |
| Judy                              | Jia         |                       |                  |             |                                          |                                                         |                                                                                            |
| Mark                              | Johnson     |                       |                  |             |                                          |                                                         |                                                                                            |
| Richard                           | Jung        |                       |                  |             |                                          |                                                         |                                                                                            |
| Mary                              | Kalafut     |                       |                  |             |                                          |                                                         |                                                                                            |
| Junaid                            | Kalia       |                       |                  |             |                                          |                                                         |                                                                                            |
| Amit                              | Kandel      |                       |                  |             |                                          |                                                         |                                                                                            |
| Scott                             | Kasner      |                       |                  |             |                                          |                                                         |                                                                                            |
| Larry                             | Katz        |                       |                  |             |                                          |                                                         |                                                                                            |
| Jeffrey                           | Katz        |                       |                  |             |                                          |                                                         |                                                                                            |
| Gurmeen                           | Kaur        |                       |                  |             |                                          |                                                         |                                                                                            |
| Michelle                          | Kearney     |                       |                  |             |                                          |                                                         |                                                                                            |
| Samuel                            | Khatib      |                       |                  |             |                                          |                                                         |                                                                                            |
| Susan                             | Kim         |                       |                  |             |                                          |                                                         |                                                                                            |
| Chee                              | Kim         |                       |                  |             |                                          |                                                         |                                                                                            |
| Joseph                            | Kipta       |                       |                  |             |                                          |                                                         |                                                                                            |
| Sebastian                         | Koch        |                       |                  |             |                                          |                                                         |                                                                                            |
| Jacob                             | Koruth      |                       |                  |             |                                          |                                                         |                                                                                            |
| Howard                            | Kreger      |                       |                  |             |                                          |                                                         |                                                                                            |
| Kristopher                        | Krueger     |                       |                  |             |                                          |                                                         |                                                                                            |
| Christeena                        | Kurian      |                       |                  |             |                                          |                                                         |                                                                                            |
| Eugene                            | LaFranchise |                       |                  |             |                                          |                                                         |                                                                                            |
| Litsa                             | Lambrakos   |                       |                  |             |                                          |                                                         |                                                                                            |
| Marie-Noelle                      | Langan      |                       |                  |             |                                          |                                                         |                                                                                            |
| Randall                           | Lee         |                       |                  |             |                                          |                                                         |                                                                                            |
| Richard                           | Libman      |                       |                  |             |                                          |                                                         |                                                                                            |
| Kaitlyn                           | Lillemoe    |                       |                  |             |                                          |                                                         |                                                                                            |
| William                           | Logan       |                       |                  |             |                                          |                                                         |                                                                                            |
| Aaron                             | Lord        |                       |                  |             |                                          |                                                         |                                                                                            |
| Steven                            | Lubitz      |                       |                  |             |                                          |                                                         |                                                                                            |

Supplemental Online Content: Nonauthor Collaborators

\*First name, last name, and suffix (if applicable) are required and will appear in PubMed.

| *First Name and Middle Initial(s) | *Last Name        | *Suffix (eg, Jr, III) | Academic Degrees | Institution | Location (city, state/province, country) | Role or Contribution, eg, chair, principal investigator | Group (if more than 1 Group listed in the byline) and/or Subgroup (eg, Steering Committee) |
|-----------------------------------|-------------------|-----------------------|------------------|-------------|------------------------------------------|---------------------------------------------------------|--------------------------------------------------------------------------------------------|
| Jeanie                            | Luciano           |                       |                  |             |                                          |                                                         |                                                                                            |
| Jennifer                          | Lynch             |                       |                  |             |                                          |                                                         |                                                                                            |
| Paul C                            | Maccaro           |                       |                  |             |                                          |                                                         |                                                                                            |
| Alejandro                         | Magadan           |                       |                  |             |                                          |                                                         |                                                                                            |
| Rakesh                            | Magun             |                       |                  |             |                                          |                                                         |                                                                                            |
| Maheen                            | Malik             |                       |                  |             |                                          |                                                         |                                                                                            |
| Amer                              | Malik             |                       |                  |             |                                          |                                                         |                                                                                            |
| Sushma                            | Manda             |                       |                  |             |                                          |                                                         |                                                                                            |
| Erika                             | Marulanda-Londono |                       |                  |             |                                          |                                                         |                                                                                            |
| Ivan                              | Matos Diaz        |                       |                  |             |                                          |                                                         |                                                                                            |
| Beth                              | Mattera           |                       |                  |             |                                          |                                                         |                                                                                            |
| Angela                            | McCall-Brown      |                       |                  |             |                                          |                                                         |                                                                                            |
| Nancy                             | Mcclelland        |                       |                  |             |                                          |                                                         |                                                                                            |
| Karl                              | Meisel            |                       |                  |             |                                          |                                                         |                                                                                            |
| Zeeshan                           | Memon             |                       |                  |             |                                          |                                                         |                                                                                            |
| Scott                             | Mendelson         |                       |                  |             |                                          |                                                         |                                                                                            |
| Ivan                              | Mendoza           |                       |                  |             |                                          |                                                         |                                                                                            |
| Theodore                          | Merriam           |                       |                  |             |                                          |                                                         |                                                                                            |
| Steven                            | Messe             |                       |                  |             |                                          |                                                         |                                                                                            |
| William M                         | Miles             |                       |                  |             |                                          |                                                         |                                                                                            |
| Marc                              | Miller            |                       |                  |             |                                          |                                                         |                                                                                            |
| Osman                             | Mir               |                       |                  |             |                                          |                                                         |                                                                                            |
| Raul                              | Mitrani           |                       |                  |             |                                          |                                                         |                                                                                            |
| Daniel                            | Morin             |                       |                  |             |                                          |                                                         |                                                                                            |
| Kent                              | Morris            |                       |                  |             |                                          |                                                         |                                                                                            |
| Mohammad                          | Moussavi          |                       |                  |             |                                          |                                                         |                                                                                            |
| Ashkan                            | Mowla             |                       |                  |             |                                          |                                                         |                                                                                            |
| Stacy                             | Moye              |                       |                  |             |                                          |                                                         |                                                                                            |
| Michael                           | Mullen            |                       |                  |             |                                          |                                                         |                                                                                            |
| Savannah                          | Mullins           |                       |                  |             |                                          |                                                         |                                                                                            |

Supplemental Online Content: Nonauthor Collaborators

\*First name, last name, and suffix (if applicable) are required and will appear in PubMed.

| *First Name and Middle Initial(s) | *Last Name  | *Suffix (eg, Jr, III) | Academic Degrees | Institution | Location (city, state/province, country) | Role or Contribution, eg, chair, principal investigator | Group (if more than 1 Group listed in the byline) and/or Subgroup (eg, Steering Committee) |
|-----------------------------------|-------------|-----------------------|------------------|-------------|------------------------------------------|---------------------------------------------------------|--------------------------------------------------------------------------------------------|
| Karah                             | Neisen      |                       |                  |             |                                          |                                                         |                                                                                            |
| Claude                            | Nguyen      |                       |                  |             |                                          |                                                         |                                                                                            |
| Imran                             | Niazi       |                       |                  |             |                                          |                                                         |                                                                                            |
| Nicholas                          | Olson       |                       |                  |             |                                          |                                                         |                                                                                            |
| Gregory                           | Olsovsky    |                       |                  |             |                                          |                                                         |                                                                                            |
| Gustavo                           | Ortiz       |                       |                  |             |                                          |                                                         |                                                                                            |
| Matthew                           | Ostrander   |                       |                  |             |                                          |                                                         |                                                                                            |
| Aneesh                            | Pakala      |                       |                  |             |                                          |                                                         |                                                                                            |
| Brett                             | Parker      |                       |                  |             |                                          |                                                         |                                                                                            |
| Mary                              | Parker      |                       |                  |             |                                          |                                                         |                                                                                            |
| Rod                               | Passman     |                       |                  |             |                                          |                                                         |                                                                                            |
| Anand                             | Patel       |                       |                  |             |                                          |                                                         |                                                                                            |
| Apoor                             | Patel       |                       |                  |             |                                          |                                                         |                                                                                            |
| Robert Andrew (Drew)              | Pickett     |                       |                  |             |                                          |                                                         |                                                                                            |
| Glenn                             | Polin       |                       |                  |             |                                          |                                                         |                                                                                            |
| Glauco                            | Radoslovich |                       |                  |             |                                          |                                                         |                                                                                            |
| Jose                              | Ramano      |                       |                  |             |                                          |                                                         |                                                                                            |
| Tapan                             | Rami        |                       |                  |             |                                          |                                                         |                                                                                            |
| Darwin                            | Ramirez     |                       |                  |             |                                          |                                                         |                                                                                            |
| Jennifer                          | Rasmussen   |                       |                  |             |                                          |                                                         |                                                                                            |
| Bappaditya                        | Ray         |                       |                  |             |                                          |                                                         |                                                                                            |
| Vivek                             | Reddy       |                       |                  |             |                                          |                                                         |                                                                                            |
| Ramakota                          | Reddy       |                       |                  |             |                                          |                                                         |                                                                                            |
| Russell                           | Reeves      |                       |                  |             |                                          |                                                         |                                                                                            |
| Robert                            | Regenhardt  |                       |                  |             |                                          |                                                         |                                                                                            |
| David                             | Rempe       |                       |                  |             |                                          |                                                         |                                                                                            |
| Paul                              | Rogers      |                       |                  |             |                                          |                                                         |                                                                                            |
| John                              | Rogers      |                       |                  |             |                                          |                                                         |                                                                                            |
| Steven                            | Rowe        |                       |                  |             |                                          |                                                         |                                                                                            |
| Chris                             | Rowley      |                       |                  |             |                                          |                                                         |                                                                                            |

Supplemental Online Content: Nonauthor Collaborators

\*First name, last name, and suffix (if applicable) are required and will appear in PubMed.

| *First Name and Middle Initial(s) | *Last Name | *Suffix (eg, Jr, III) | Academic Degrees | Institution | Location (city, state/province, country) | Role or Contribution, eg, chair, principal investigator | Group (if more than 1 Group listed in the byline) and/or Subgroup (eg, Steering Committee) |
|-----------------------------------|------------|-----------------------|------------------|-------------|------------------------------------------|---------------------------------------------------------|--------------------------------------------------------------------------------------------|
| Ilana                             | Ruff       |                       |                  |             |                                          |                                                         |                                                                                            |
| Matthew                           | Sackett    |                       |                  |             |                                          |                                                         |                                                                                            |
| Rehan                             | Sajjad     |                       |                  |             |                                          |                                                         |                                                                                            |
| Rony                              | Salem      |                       |                  |             |                                          |                                                         |                                                                                            |
| Marc                              | Saltzman   |                       |                  |             |                                          |                                                         |                                                                                            |
| Pasquale                          | Santangeli |                       |                  |             |                                          |                                                         |                                                                                            |
| Scott                             | Saucedo    |                       |                  |             |                                          |                                                         |                                                                                            |
| Robert                            | Sawyer     |                       |                  |             |                                          |                                                         |                                                                                            |
| Robert                            | Schaller   |                       |                  |             |                                          |                                                         |                                                                                            |
| Susan                             | Seeger     |                       |                  |             |                                          |                                                         |                                                                                            |
| Pramod                            | Sethi      |                       |                  |             |                                          |                                                         |                                                                                            |
| Ty                                | Shang      |                       |                  |             |                                          |                                                         |                                                                                            |
| Jitendra                          | Sharma     |                       |                  |             |                                          |                                                         |                                                                                            |
| Richa                             | Sharma     |                       |                  |             |                                          |                                                         |                                                                                            |
| Kara                              | Sheinart   |                       |                  |             |                                          |                                                         |                                                                                            |
| Gunjan                            | Shukla     |                       |                  |             |                                          |                                                         |                                                                                            |
| Jeffrey                           | Shultz     |                       |                  |             |                                          |                                                         |                                                                                            |
| Evgeny                            | Sidorov    |                       |                  |             |                                          |                                                         |                                                                                            |
| Scott                             | Silverman  |                       |                  |             |                                          |                                                         |                                                                                            |
| Jay                               | Simonson   |                       |                  |             |                                          |                                                         |                                                                                            |
| David                             | Singh      |                       |                  |             |                                          |                                                         |                                                                                            |
| Elaine                            | Skalabrin  |                       |                  |             |                                          |                                                         |                                                                                            |
| Kelly                             | Sloane     |                       |                  |             |                                          |                                                         |                                                                                            |
| Macey                             | Smith      |                       |                  |             |                                          |                                                         |                                                                                            |
| Wade                              | Smith      |                       |                  |             |                                          |                                                         |                                                                                            |
| Diane                             | Soik       |                       |                  |             |                                          |                                                         |                                                                                            |
| Stavros                           | Stavrakis  |                       |                  |             |                                          |                                                         |                                                                                            |
| Laura                             | Stein      |                       |                  |             |                                          |                                                         |                                                                                            |
| Jonathan S                        | Steinberg  |                       |                  |             |                                          |                                                         |                                                                                            |
| Nicole                            | Sur        |                       |                  |             |                                          |                                                         |                                                                                            |
| Donald                            | Switzer    |                       |                  |             |                                          |                                                         |                                                                                            |

Supplemental Online Content: Nonauthor Collaborators

\*First name, last name, and suffix (if applicable) are required and will appear in PubMed.

| *First Name and Middle Initial(s) | *Last Name  | *Suffix (eg, Jr, III) | Academic Degrees | Institution | Location (city, state/province, country) | Role or Contribution, eg, chair, principal investigator | Group (if more than 1 Group listed in the byline) and/or Subgroup (eg, Steering Committee) |
|-----------------------------------|-------------|-----------------------|------------------|-------------|------------------------------------------|---------------------------------------------------------|--------------------------------------------------------------------------------------------|
| Nadeem                            | Talpur      |                       |                  |             |                                          |                                                         |                                                                                            |
| Aaron                             | Tansy       |                       |                  |             |                                          |                                                         |                                                                                            |
| Kristi                            | Tempro      |                       |                  |             |                                          |                                                         |                                                                                            |
| Varoon                            | Thavapalan  |                       |                  |             |                                          |                                                         |                                                                                            |
| Abraham                           | Thomas      |                       |                  |             |                                          |                                                         |                                                                                            |
| Kevin                             | Thomas      |                       |                  |             |                                          |                                                         |                                                                                            |
| Jose                              | Torres      |                       |                  |             |                                          |                                                         |                                                                                            |
| Luis                              | Torres      |                       |                  |             |                                          |                                                         |                                                                                            |
| Stanley                           | Tuhrim      |                       |                  |             |                                          |                                                         |                                                                                            |
| Poulina                           | Uddin       |                       |                  |             |                                          |                                                         |                                                                                            |
| Gabriel                           | Vidal       |                       |                  |             |                                          |                                                         |                                                                                            |
| Anand                             | Viswanathan |                       |                  |             |                                          |                                                         |                                                                                            |
| John                              | Volpi       |                       |                  |             |                                          |                                                         |                                                                                            |
| Kathleen                          | Ward        |                       |                  |             |                                          |                                                         |                                                                                            |
| Jesse                             | Weinberger  |                       |                  |             |                                          |                                                         |                                                                                            |
| William                           | Whang       |                       |                  |             |                                          |                                                         |                                                                                            |
| Michael                           | Wilder      |                       |                  |             |                                          |                                                         |                                                                                            |
| Jonathan                          | Willner     |                       |                  |             |                                          |                                                         |                                                                                            |
| Paul                              | Wright      |                       |                  |             |                                          |                                                         |                                                                                            |
| Qingyang                          | Yuan        |                       |                  |             |                                          |                                                         |                                                                                            |
| Cen                               | Zhang       |                       |                  |             |                                          |                                                         |                                                                                            |
| Dennis                            | Zhu         |                       |                  |             |                                          |                                                         |                                                                                            |
| Kenneth                           | Zide        |                       |                  |             |                                          |                                                         |                                                                                            |
| John                              | Zimmerman   |                       |                  |             |                                          |                                                         |                                                                                            |
| Richard                           | Zweifler    |                       |                  |             |                                          |                                                         |                                                                                            |
