# Supplementary material for: Predictors of Atrial Fibrillation in Patients With Stroke Attributed to Large- or Small-Vessel Disease: A Prespecified Secondary Analysis of the STROKE AF Randomized Clinical Trial
Source: PubMed Central journal article supplement — JAMA Neurol. 2022 Nov 14;80(1):99–103. doi: 10.1001/jamaneurol.2022.4038 (PMC9664367; doi:10.1001/jamaneurol.2022.4038), 2022-11-14
Supplement: jamaneurol-e224038-s004.pdf [file jamaneurol-e224038-s004.pdf]

## Data Sharing Statement

Schwamm. Predictors of Atrial Fibrillation in Patients With Stroke Attributed to Large- or Small-Vessel Disease. *JAMA Neurol.* Published November 14, 2022.  
doi:10.1001/jamaneurol.2022.4038

### Data

**Data available:** No
